# Supplementary material
Source: Springer Nature journal article supplement (https://www.springermedizin.de/resource/supplementary/12990_2014_638_MOESM3_ESM.pdf/9612274)

## Audible vocalizations

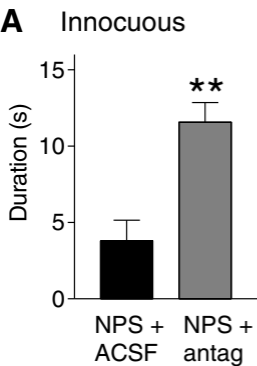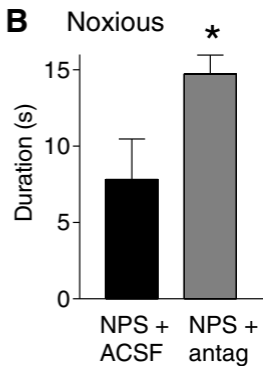

## Ultrasonic vocalizations

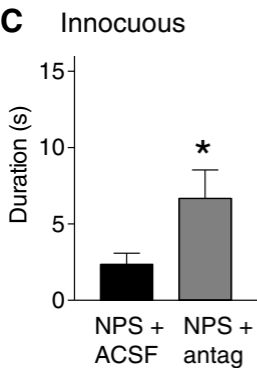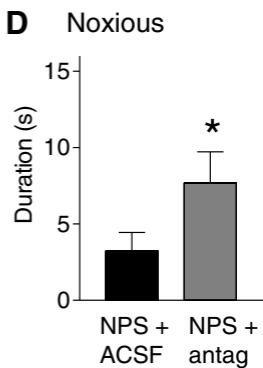

Supplement: MOESM3 [file 9612274]
